1 **Insight in the quorum sensing-driven lifestyle of the non-pathogenic *Agrobacterium***  
2 ***tumefaciens* 6N2 and the interactions with the yeast *Meyerozyma guilliermondii***

3

4 Elisa Violeta Bertini<sup>1</sup>, Mariela Analía Torres<sup>1</sup>, Thibaut Léger<sup>2§</sup>, Camille Garcia<sup>2</sup>, Kar-Wai  
5 Hong<sup>3,4</sup>, Teik Min Chong<sup>3,5</sup>, Lucía I. Castellanos de Figueroa<sup>1,6</sup>, Kok-Gan Chan<sup>3,4,7</sup>, Yves  
6 Dessaux<sup>8</sup>, Jean-Michel Camadro<sup>9</sup>, Carlos Gabriel Nieto-Peñalver<sup>1,6\*</sup>

7

8 <sup>1</sup> PROIMI, CONICET (Planta Piloto de Procesos Industriales Microbiológicos), Av.  
9 Belgrano y Pje. Caseros, Tucumán, Argentina.

10 <sup>2</sup> ProteoSeine@IJM, Université de Paris, CNRS, Institut Jacques Monod, F-75006 Paris,  
11 France.

12 <sup>3</sup> Institute of Biological Sciences, Faculty of Science, University of Malaya, 50603 Kuala  
13 Lumpur, Malaysia.

14 <sup>4</sup> International Genome Centre, Jiangsu University, 212013, Zhenjiang, China.

15 <sup>5</sup> Institute of Marine Sciences, Shantou University, Shantou 515063, China.

16 <sup>6</sup> Instituto de Microbiología, Facultad de Bioquímica, Química y Farmacia, Universidad  
17 Nacional de Tucumán, Tucumán, Argentina.

18 <sup>7</sup> Department of Biotechnology, Faculty of Applied Sciences, UCSI University, Cheras,  
19 Wilayah Persekutuan Kuala Lumpur, Malaysia.

20 <sup>8</sup> Institut de Biologie Intégrative de la Cellule, Université Paris-Sud, Université Paris-  
21 Saclay, CNRS, CEA., F-91190 Gif-sur-Yvette, France.

22 <sup>9</sup> CNRS, Institut Jacques Monod, Univ. Paris Diderot, Paris, France.

23 <sup>§</sup> Current address: Fougères Laboratory, French Agency for Food, Environmental and  
24 Occupational Health & Safety (ANSES), 35306 Fougères CEDEX, France.

25 \* corresponding author

26

27 KEYWORDS: QUORUM SENSING; INTERACTIONS; ENDOPHYTIC; PROTEOMIC;

28 AGROBACTERIA

29

30

31 **Highlights**

32 The avirulent *A. tumefaciens* 6N2 has two replicons and a complex QS architecture

33 The profile of QS-regulated proteins is modified in dual cultures with *Pa. laurentii*

34 The bacterial QS activity alters the proteome of the yeast *Pa. laurentii*

35

36

37

38

39

40

41

42

43

44

45

46

47

48

49 Abstract

50 *Agrobacterium tumefaciens* is considered a prominent phytopathogen, though most isolates  
51 are nonpathogenic. Agrobacteria can inhabit plant tissues interacting with other  
52 microorganisms. Yeasts are likewise part of these communities. We analyzed the quorum  
53 sensing (QS) systems of *A. tumefaciens* strain 6N2, and its relevance for the interaction  
54 with the yeast *Meyerozyma guilliermondii*, both sugarcane endophytes. We show that strain  
55 6N2 is nonpathogenic, produces OHC8-HSL, OHC10-HSL, OC12-HSL and OHC12-HSL  
56 as QS signals, and possesses a complex QS architecture, with one truncated, two complete  
57 systems, and three additional QS-signal receptors. A proteomic approach showed  
58 differences in QS-regulated proteins between pure (64 proteins) and dual (33 proteins)  
59 cultures. Seven proteins were consistently regulated by quorum sensing in pure and dual  
60 cultures. *M. guilliermondii* proteins influenced by QS activity were also evaluated. Several  
61 up- and down- regulated proteins differed depending on the bacterial QS. These results  
62 show the importance of the QS regulation in the bacteria-yeast interactions.

63

64

65

66

67

68

69

70

71

72

73

## 74 **Introduction**

75 *Agrobacterium tumefaciens* is an alpha-proteobacterium of the Rhizobiaceae family,  
76 considered as one of the most important plant pathogens, which produces characteristic  
77 crown galls on numerous dicotyledoneous plants [1]. Its pathogenicity is related to the  
78 transfer of a piece of DNA, the T-DNA, from its oncogenic Ti plasmid, to the plant cell.  
79 However, in nature, most agrobacterial strains are devoid of a Ti plasmid, and are in  
80 consequence avirulent commensals [2]. The conjugation of Ti plasmid depends partially on  
81 a quorum sensing (QS) -regulated process [3]. QS is a cell–cell communication system that  
82 coalesces gene expression with the bacterial cell concentration [4]. It relies upon the  
83 production by LuxI homolog enzymes of signal molecules, termed autoinducers, whose  
84 concentration theoretically mimics that of the producing bacteria [5]. QS signals are  
85 perceived by a complementary LuxR homolog receptor protein when signals, hence cells,  
86 reach a threshold concentration [5]. Once the sensor binds the signal, it becomes activated  
87 and modifies the expression of QS-target genes. The model *A. fabrum* (formerly *A.*  
88 *tumefaciens*) strain C58 possesses a LuxI/LuxR-type QS system that utilizes 3-oxo-*N*-  
89 octanoyl-homoserine lactone (3OC8-HSL) as QS signal [6]. 3OC8-HSL, a member of the  
90 acyl homoserine lactone (AHL) family, the most characterized QS molecules in  
91 proteobacteria, is synthesized by the TraI enzyme, and is bound by the TraR receptor. The  
92 3OC8-HSL-TraR complex activates the transcription of genes involved in the conjugative  
93 transfer of the Ti plasmid [7]. Although largely characterized in the strain C58 and other  
94 pathogenic strains, little is known about QS systems in commensal agrobacteria.

95 Though mostly considered a soil inhabitant, it is now clear that agrobacteria can  
96 also colonize the inner plant tissues, living as endophytes in stems, fruits and roots [8,9]. To

97 date, their interactions with the host and other microorganisms in those particular niches  
98 remains poorly evaluated. Noteworthy, yeasts are also part of these complexes  
99 communities. Ascomycetous and Basidiomycetous yeasts have been identified as  
100 endophytes, including *Candida*, *Rhodotorula*, *Cryptococcus*, *Hanseniaspora*,  
101 *Debaryomyces* and *Metschnikowia*. It is expectable that these unicellular fungi interact with  
102 bacteria, including agrobacteria, in the endophytic polymicrobial communities. Their role  
103 in QS mediated interactions is unknown, even if a capacity to inactivate AHLs was  
104 demonstrated in several species [10].

105         During a previous survey of the endophytic microbiota of sugarcane (*Saccharum*  
106 *officinarum* L.), we isolated the yeast *Meyerozyma guilliermondii* strain 6N and *A.*  
107 *tumefaciens* strain 6N2 from the same node section, suggesting that these two  
108 microorganisms can co-occupy this niche and, in consequence, interact with each other  
109 [11,12]. In contrast to other species, this *M. guilliermondii* isolate show a very weak  
110 capacity to inactivate AHLs [10].

111         Information on the influence of the QS regulatory mechanisms on the interkingdom  
112 interactions remains scarce. Especially, little is known about how the QS regulation of a  
113 microorganism can affect the physiology of a second microorganism. In this report, we  
114 describe the complex architecture of the *A. tumefaciens* 6N2 QS system, responsible for the  
115 production of several AHLs. We performed proteomic analyses to characterize the QS  
116 regulation in this strain, and unveil how it is influenced in a dual culture with *M.*  
117 *guilliermondii* 6N and how this second microorganism is affected by the bacterial QS  
118 activity.

119

120 **Results**

121 **Strain 6N2 is a bona fide *Agrobacterium tumefaciens* isolate producing several AHLs**

122 Strain 6N2 showed a 16S rDNA sequence highly similar to those of the  
123 *Agrobacterium/Rhizobium* group (Genbank accession number MG062741). The sugarcane  
124 plant utilized in its isolation presented no symptoms of tumor formation, suggesting the  
125 non-pathogenicity of this isolate. This was confirmed with *A. thaliana* and tomato plants,  
126 which did not develop the characteristic tumors after inoculation with 6N2 strain (Fig. 1).

127 The fragmentation of molecules obtained from culture extracts confirmed the production of  
128 AHLs by strain 6N2, according to the characteristic  $[M+H]^+$  of 102 m/z (Fig. 2). The  
129 determination of parent ions showed 4 molecules of  $[M+H]^+$  244.4, 272.5, 298.6 and 300.6  
130 m/z (Fig. 2), attributed to *N*-3-hydroxy-octanoyl-homoserine lactone (OHC8-HSL), *N*-3-  
131 hydroxy-decanoyl-homoserine lactone (OHC10-HSL), *N*-3-oxo-dodecanoyl-homoserine  
132 lactone (OC12-HSL) and *N*-3-hydroxy-dodecanoyl-homoserine lactone (OHC12-HSL),  
133 respectively (Suppl. Fig. 1).

134

135 **Genomic characterization of *A. tumefaciens* 6N2**

136 Genome sequencing of strain 6N2 revealed 2 replicons of 2,913,790 bp and 2,168,919 bp  
137 (Fig. 3A and B). The second replicon was assumed to be a linear chromosome considering  
138 the cumulative GC skew that suggested a replication origin at the center of the sequence  
139 (data not shown), and the identification of a *telA* ortholog (AT6N2\_L1435), coding for  
140 TelA protelomerase. Genome annotation produced 3,013 and 2,074 CDS in the circular and  
141 the linear chromosome, respectively (Fig. 3). No traces of Ti or At plasmids were detected.  
142 Prophage *I6-3* genes (coordinates: 282,851-343,277) were detected in the circular  
143 chromosome; several incomplete prophages (RHEph01, RcCronus, XcP1, SH2026Stx1 and  
144 Stx2a\_F451) were predicted in the circular and linear chromosome (data not shown). Type

145 IV (T4SS) and VI (T6SS) secretion systems were identified in the linear chromosome (Fig.  
146 3B). Genomic islands were predicted in both chromosomes (Fig. 3A and B), and a probable  
147 integrative and conjugative element (ICE) in the linear chromosome (coordinates: 712,734-  
148 940,892) (Fig. 3B).

149

### 150 **Identification of quorum sensing systems in *A. tumefaciens* 6N2**

151 Strain 6N2 genomic sequence showed the absence of a QS system comparable to the  
152 TraI/TraR QS system of *A. fabrum* strain C58 [3]. A more complex architecture was  
153 identified in the linear chromosome (Fig. 3B and Fig. 4). A first system, here named QS1  
154 (coordinates 1,189,496-1,191,920) was composed of *luxR* orthologues AT6N2\_L1344 and  
155 AT6N2\_L1347, one overlapped by the last 4 bp of the *luxI* ortholog AT6N2\_L1345.  
156 Considering this R-IR topology, similar to *A. fabacearum* strain P4 QS system [13], genes  
157 were named accordingly *cinR*, *cinI* and *cinX*.

158 A second QS system, named QS2 (coordinates 793,262-794,901), was found in the linear  
159 chromosome transcribed in the same direction as QS1 (Fig. 3B and Fig. 4). With a R-I  
160 topology, QS2 was composed of the *luxI* and a *luxR* orthologues *traI2* (AT6N2\_L0888) and  
161 *traR2* (AT6N2\_L0889), respectively. A truncated system, here named tQS (coordinates  
162 762,651-763,813) was also found in the linear chromosome and in the opposite direction to  
163 QS1 and QS2 (Fig. 3B and Fig. 4). tQS, composed of a *luxR* (AT6N2\_L0841) and a  
164 truncated *luxI* (AT6N2\_L0840) orthologues, was probably originated from a partial  
165 duplication and inversion of QS1. Indeed, *luxR* and *cinX* showed 90% identity (641/711);  
166 *luxI* and *cinI* showed 92% identity (420/456). With 456 nucleotides, this *luxI* is  
167 significantly shorter than *cinI* (765 nucleotides). tQS genes were named accordingly as  
168 *cinX<sub>t</sub>* and *cinI<sub>t</sub>* (Fig. 3B and Fig. 4). Three *luxR* orthologues were identified in the circular

169 chromosome (Fig. 3A). AT6N2\_C1772 (coordinates 1,401,123-1,400,383) was named *rhiR*  
170 for its homology with *A. radiobacter rhiR* and *A. fabrum C58 Atu0707*. AT6N2\_C2737  
171 (coordinates 2,231,916-2,232,653) was named *solR* for its homology with *A. radiobacter*  
172 *solR* and *A. fabrum C58 Atu2727*. AT6N2\_C3352 (coordinates 2,749,807-2,750,523) was  
173 named *atxR* due to its homology with *A. fabrum C58 atxR* (Atu2285) (Fig. 3A). The  
174 analysis of the putative aminoacid sequences of AtxR, SolR and RhiR showed the  
175 characteristics domains for DNA and autoinducer binding (data not shown).

176 A search in *Agrobacterium* genomes allowed the identification of strains with similar  
177 topologies in the QS systems. *A. tumefaciens* strain 5A, *A. fabacearum* P4, *A. deltaense*  
178 strains RV3 and NCPPB1641 and *A. radiobacter* strain DSM30147 exhibit QS systems  
179 similar to QS1 (R-IR topology). Synteny throughout 16,200 bp upstream QS1 is highly  
180 conserved among these strains (Suppl. Fig. 2A). QS2 topology (R-I) was detected in *A.*  
181 *tumefaciens* strains S2, S33, *Agrobacterium* sp. strain SUL3 and *A. arsenijevicei* strain  
182 KFB330, but with no conservation of synteny (data not shown). Homologues of *atxR*  
183 (Suppl. Fig. 2B), *solR* (Suppl. Fig. 2C) and *rhiR* (Suppl. Fig. 2D) were identified in all  
184 these strains, including strain C58, with synteny highly conserved, encompassing 235,500  
185 bp, 785,000 bp, and 98,000 bp, respectively.

186 A multiple alignment of aminoacid sequences of LuxI orthologues showed identities higher  
187 between strain 6N2 CinI and proteins with the same R-IR topology (Suppl. Fig. 3A).  
188 Orthologues with R-I topology like 6N2 TraI2 presented less similarity among them. CinR,  
189 CinX, CinXt, AtxR, SolR and RhiR also showed high similarities with orthologues sharing  
190 the topology and synteny (Suppl. Fig. 3B). Similar to TraI2, low similarities were found  
191 among 6N2 TraR2 and orthologues with the R-I topology. To note, all the 6N2 LuxI and  
192 LuxR orthologues showed low similarities with *A. fabrum C58 TraI* and *TraR*.



193

## 194 **Modulation of *A. tumefaciens* strain 6N2 proteome by QS**

195 Quorum quenching strategy with pME6863 [14] was successful for the attenuation of the *A.*  
196 *tumefaciens* 6N2 (see Suppl. Figure 4). At late exponential growth phase, no growth  
197 differences were found between *A. tumefaciens* 6N2 carrying the empty control vector  
198 pME6000 and *A. tumefaciens* 6N2 (pME6863). Both strains attained cell densities of  $\sim 1.5$   
199  $10^9$  CFU ml<sup>-1</sup> (data not shown). A total of 2,637 proteins were identified in extracts from  
200 single cultures of *A. tumefaciens* 6N2 (pME6000) and *A. tumefaciens* 6N2 (pME6863).  
201 Considering a  $p \leq 0.05$  and a FC  $\geq 1.5$ , the attenuation of the QS activity altered the relative  
202 abundances of 64 proteins in single cultures of *A. tumefaciens* strain 6N2 (6N2<sup>QSPR</sup> group),  
203 coded in the circular (37) and the linear (27) chromosome (Fig. 5A and Table 1). Thirty-  
204 three were more abundant in *A. tumefaciens* strains 6N2 (pME6000) in comparison with *A.*  
205 *tumefaciens* strain 6N2 (pME6863), indicating an upregulation by QS (6N2<sup>QSPR<sub>up</sub></sup>  
206 subgroup); 31 in 6N2<sup>QSPR</sup> group were less abundant in *A. tumefaciens* 6N2 (pME6000),  
207 indicating a downregulation by QS (6N2<sup>QSPR<sub>dw</sub></sup> subgroup) (Fig. 5A and Table 1).  
208 6N2<sup>QSPR</sup> proteins were classified in eggNOG, mainly in Energy production and conversion  
209 (4), and Amino acid transport and metabolism (8); 14 were classified as Function unknown  
210 (Suppl. Fig. 5A and 5B). To gain insight into the influence of QS on *A. tumefaciens* strain  
211 6N2 physiology, the ontology of 6N2<sup>QSPR</sup> group proteins were analyzed (Suppl. Fig. 6). In  
212 the Biological Process (BP) ontology of 6N2<sup>QSPR</sup> group (Suppl. Fig. 6A and 6B), most were  
213 classified in Biosynthesis (GO:0009058), Cell organization and biogenesis (GO:0016043),  
214 Metabolism (GO:0008152), Transport (GO:0006810), and Nucleobase, nucleoside,  
215 nucleotide and nucleic acid metabolism (GO:0006139). The Cellular Component (CC)  
216 ontology (Suppl. Fig. 6C and 6D) showed most of the proteins classified in Cell

217 (GO:0005623), and Intracellular (GO:0005622). In the Molecular Function (MF) ontology  
218 (Suppl. Fig. 6E and 6F), most of the 6N2<sup>QSPR</sup> group proteins were in Binding  
219 (GO:0005488), Catalytic activity (GO:0003824), Hydrolase activity (GO:0016787) and  
220 Transferase activity (GO:0016740).

221 Regulatory and signaling proteins were identified in the 6N2<sup>QSPR</sup> group: CinX regulatory  
222 protein (AT6N2\_L1344), LacI-type regulator (AT6N2\_C1926), and GntR-type  
223 (AT6N2\_C0879) transcriptional regulators in 6N2<sup>QSPR</sup><sub>up</sub> subgroup; two sensor histidine  
224 kinases (AT6N2\_C3453 and AT6N2\_C3125), and YebC-like regulator (AT6N2\_L1564) in  
225 6N2<sup>QSPR</sup><sub>dw</sub>. Several proteins in 6N2<sup>QSPR</sup> group were related to transport of small molecules  
226 or ions: a mechanosensitive ion channel protein (AT6N2\_C0650), a DMT family  
227 transporter (AT6N2\_C0483), an ABC transporter permease (AT6N2\_C3519), a multidrug  
228 efflux RND transporter permease subunit (AT6N2\_C3101) and an ABC transporter  
229 substrate-binding protein (AT6N2\_L1359) in 6N2<sup>QSPR</sup><sub>up</sub> subgroup; a transporter substrate-  
230 binding domain-containing protein (AT6N2\_C3262), a dicarboxylate/amino acid:cation  
231 symporter (AT6N2\_L0298), an ABC transporter substrate-binding protein  
232 (AT6N2\_L0602) and an ABC transporter ATP-binding protein/permease (AT6N2\_L1331)  
233 in 6N2<sup>QSPR</sup><sub>dw</sub>.

234 Several proteins in 6N2<sup>QSPR</sup><sub>up</sub> can be highlighted. Orthologues of AT6N2\_L0856 (pilus  
235 assembly protein), AT6N2\_L0857 (Conjugal Transfer Protein D), and AT6N2\_L2010  
236 (Mobilization Protein C) are related to the QS-regulated transfer of pTi and pAt in strain  
237 C58, and of pAt in strain P4 through a type IV secretion system. In addition to CinX, RhiR  
238 (AT6N2\_C1772) was the only protein from the complex 6N2 QS system identified in the  
239 proteomic analysis. RhiR was over accumulated (p<0.05) when the QS system was  
240 attenuated with a FC=1.49, just below the arbitrary limit established in this work.

241

242 **The yeast *M. guilliermondii* 6N alters the QS regulation in *A. tumefaciens* 6N2**

243 At late exponential growth phase, cell densities of both *A. tumefaciens* 6N2 (pME6000) and  
244 *A. tumefaciens* 6N2 (pME6863) were one log unit lower than in pure cultures ( $\sim 3.6 \cdot 10^8$   
245 CFU ml<sup>-1</sup>), with no differences between the two strains (data not shown). A total ion  
246 current normalization based exclusively on bacterial proteins were applied to allow a  
247 comparison between pure and dual cultures.

248 A notable reduction in QS-regulated proteins was determined in dual culture with *M.*  
249 *guilliermondii* 6N. Only 33 proteins (6N2<sup>QSCO</sup> group) were influenced by the QS activity,  
250 which were coded in the circular (19) and the linear (14) chromosome (Table 1). In  
251 6N2<sup>QSCO</sup>, 22 were more abundant in strain 6N2 (pME6000), indicating an upregulation by  
252 QS (6N2<sup>QSCO</sup><sub>up</sub> subgroup) in co-culture. Eleven proteins of 6N2<sup>QSCO</sup> were less abundant,  
253 indicating a downregulation (6N2<sup>QSCO</sup><sub>dw</sub> subgroup) in dual culture (Fig. 5A and Table 1).

254 6N2<sup>QSCO</sup> proteins were mainly classified (Suppl. Fig. 5A and 5B) in Transcription (3) and  
255 Function unknown (12). In BP ontology (Suppl. Fig. 6A and 6B), most were classified in  
256 Biosynthesis (GO:0009058), and Metabolism (GO:0008152). In CC ontology (Suppl. Fig.  
257 6C and 6D), the majority were classified in Cell (GO:0005623) and Plasma membrane  
258 (GO:0005886). The MF ontology of 6N2<sup>QSCO</sup> (Suppl. Fig. 6E and 6F) showed most  
259 classified in Binding (GO:0005488), Catalytic activity (GO:0003824), and Hydrolase  
260 activity (GO:0016787).

261 In the 6N2<sup>QSCO</sup> group, 4 were regulatory proteins or related to signal transduction: CinX  
262 (AT6N2\_L1344), ArsR family transcriptional factor (AT6N2\_C3363) and Xre family  
263 transcriptional factor (AT6N2\_L0663) in the 6N2<sup>QSCO</sup><sub>up</sub> subgroup; a Response regulator  
264 PleD (AT6N2\_C1017) in 6N2<sup>QSCO</sup><sub>dw</sub>. Four were related to transport of nutrients: a

265 component of a metal ABC transporter permease (AT6N2\_C1510) and a component of a  
266 zinc ABC transporter (AT6N2\_C0769) in 6N2<sup>QSCO</sup><sub>up</sub> subgroup; a sugar ABC transporter  
267 ATP-binding protein (AT6N2\_L0645) and an ABC transporter substrate-binding protein  
268 (AT6N2\_L1359) in 6N2<sup>QSCO</sup><sub>dw</sub>. Phage proteins were identified in the 6N2<sup>QSCO</sup><sub>dw</sub> subgroup:  
269 a major capsid protein (AT6N2\_C0409), an ATP-binding protein (AT6N2\_C0382) and a  
270 DNA polymerase III subunit beta (AT6N2\_C0386), all part of the predicted prophage *16-3*.  
271 The comparison between the different subgroups showed only 7 common proteins between  
272 6N2<sup>QSPR</sup><sub>up</sub> and 6N2<sup>QSCO</sup><sub>up</sub> (Fig. 8A): Nucleotidyltransferase (AT6N2\_L0014), Hypothetical  
273 Protein (AT6N2\_L0851), Pilus assembly protein (AT6N2\_L0856), Conjugal Transfer  
274 Protein D (AT6N2\_L0857), CinX (AT6N2\_L1344), TauD/TfdA family dioxygenase  
275 (AT6N2\_L1355) and ABC transporter substrate-binding protein (AT6N2\_L1359). No  
276 common proteins were found in the comparison between 6N2<sup>QSPR</sup><sub>dw</sub> and 6N2<sup>QSCO</sup><sub>dw</sub> (Fig.  
277 8A). Similar to single cultures, CinX and RhiR were the only components of the 6N2 QS  
278 system identified, though in co-culture RhiR was not supported statistically ( $p > 0.05$ ).

279

## 280 **The QS activity of *A. tumefaciens* 6N2 modifies the proteome of *M. guilliermondii* 6N**

281 The yeast *M. guilliermondii* 6N reached a cell density of  $\sim 1.2 \cdot 10^8$  CFU ml<sup>-1</sup> in pure  
282 culture, one log unit higher in comparison to dual cultures with *A. tumefaciens* 6N2  
283 (pME6000) ( $3.2 \cdot 10^7$  CFU ml<sup>-1</sup>) and *A. tumefaciens* 6N2 (pME6863) ( $4.6 \cdot 10^7$  CFU ml<sup>-1</sup>).  
284 Similar to *A. tumefaciens* 6N2, a total ion current normalization based exclusively on yeast  
285 proteins were applied to allow a comparison between pure and dual cultures.

286 The comparison of the *M. guilliermondii* proteomes between pure and dual cultures,  
287 showed 287 proteins (Table 2) whose abundances were modified by *A. tumefaciens*  
288 (pME6000) (Y6N<sup>QS+</sup> group): 141 upregulated (Y6N<sup>QS+</sup><sub>up</sub> subgroup) and 146 downregulated

289 (Y6N<sup>QS+</sup><sub>dw</sub> subgroup). On the other hand, 275 proteins (Table 2) were modified by *A.*  
290 *tumefaciens* (pME6863) (Y6N<sup>QS-</sup> group): 131 up-accumulated (Y6N<sup>QS-</sup><sub>up</sub> subgroup) and  
291 144 down-accumulated (Y6N<sup>QS-</sup><sub>dw</sub> subgroup) (Figure 5B). To note, 98 proteins were  
292 common among Y6N<sup>QS+</sup><sub>up</sub> and Y6N<sup>QS-</sup><sub>up</sub> subgroups; 86 were common among Y6N<sup>QS+</sup><sub>dw</sub>  
293 and Y6N<sup>QS-</sup><sub>dw</sub> (Figure 5B and Table 2). These 184 (98+86) common proteins were then  
294 attributed to the presence of the bacterium, independently of the agrobacterial QS activity,  
295 and in consequence no longer considered in this report. In comparison to the pure culture,  
296 among the fungal proteins increased due to strain 6N2 QS activity, 43 were identified in  
297 Y6N<sup>QS+</sup><sub>up</sub> subgroup and 33 were in Y6N<sup>QS-</sup><sub>up</sub>. The categories of each subgroup in eggNOG  
298 were dissimilar (Suppl. Fig. 7A). For instance, several categories were more numerous in  
299 Y6N<sup>QS+</sup><sub>up</sub>, including RNA Processing and modification, Energy production and conversion,  
300 Amino acid transport and metabolism, Lipid transport and metabolism, Posttranslational  
301 modification, protein turnover, chaperones, Secondary metabolites biosynthesis, transport  
302 and catabolism, and Intracellular trafficking, secretion, and vesicular transport. In  
303 Y6N<sup>QS+</sup><sub>dw</sub>, Translation, ribosomal structure and biogenesis was more numerous (Figure  
304 7A). Biological Process (BP), Cellular Component (CC) and Molecular Function (MF)  
305 ontologies showed differences among Y6N<sup>QS+</sup><sub>up</sub> and Y6N<sup>QS-</sup><sub>up</sub>. These dissimilarities were  
306 more notorious in Biosynthesis (GO:0009058), Catabolism (GO:0009056), Metabolism  
307 (GO:0008152) and Protein metabolism (GO:0019538) of BP ontology; Cell (GO:0005623)  
308 and Intracellular (GO:0005622) of CC ontology; and Binding (GO:0005488), Catalytic  
309 activity (GO:0003824), Nucleic acid binding (GO:0003676), Nucleotide binding  
310 (GO:0000166) and Transporter activity (GO:0005215) of MF ontology (Suppl. Figures 8A,  
311 8C and 8D). In Y6N<sup>QS+</sup><sub>up</sub> subgroup, it is to highlight the identification of E3 ubiquitin-  
312 protein ligase (A5DGJ2), E2 ubiquitin-conjugating enzyme (A5DL67), protein kinase

313 domain-containing protein (A5DE57) and RAS-domain containing protein (A5DKQ9). In  
314 Y6N<sup>QS-up</sup>, Vacuolar proton pump subunit B (A5DEC0), Vacuolar protein sorting-associated  
315 protein (A5DHU0), V-type proton ATPase subunit (A5DLL8) and Phosphoenolpyruvate  
316 carboxykinase (A5DD88). The same observation was made in the comparison of proteins  
317 down-regulated by the agrobacterial QS activity in Y6N<sup>QS+<sub>dw</sub></sup> and Y6N<sup>QS-<sub>dw</sub></sup>. Data from  
318 eggNOG (Suppl. Fig. 7B) showed, for instance, Y6N<sup>QS+<sub>dw</sub></sup> proteins more numerous in  
319 categories that include RNA Processing and modification, Coenzyme transport and  
320 metabolism, and Transcription. Proteins in Posttranslational modification, protein turnover,  
321 chaperones were more numerous in Y6N<sup>QS-<sub>dw</sub></sup> than in Y6N<sup>QS+<sub>dw</sub></sup>.  
322 Biological Process (BP), Cellular Component (CC) and Molecular Function (MF)  
323 ontologies of Y6N<sup>QS+<sub>dw</sub></sup> and Y6N<sup>QS-<sub>dw</sub></sup> also presented differences in the values of proteins  
324 assigned to each category (Suppl. Fig. 8B, 8D and 8F). Main differences were in Cell  
325 communication, Cell cycle, Cell organization and biogenesis, Organelle organization and  
326 biogenesis, Protein metabolism, Cell, Intracellular, Catalytic activity and Transferase  
327 activity, among others.

328

## 329 **Discussion**

330 Strain 6N2 belongs to the group of avirulent and commensal agrobacteria. This strain was  
331 obtained from sugarcane, which is in contrast to dicots **is** not susceptible to crown gall  
332 formation [15]. An At plasmid is also absent in its genome, indicating that strain 6N2 is a  
333 plasmid-less agrobacterium. Possibly, this particular niche, with no selective pressure to  
334 maintain extrachromosomal replicons, had molded the 6N2 genome [16].

335 In comparison with strain C58 [3], strain 6N2 produces four AHLs, and two AHL  
336 synthases are encoded in its linear chromosome. One of this molecule, 3OHC8-HSL, has

337 also been reported in the non-pathogenic strain P4 [13], which similarly harbors CinI coded  
338 in a QS system with the same R-IR topology as 6N2 QS1. It is then plausible that 6N2 CinI  
339 is also involved in 3OHC8-HSL production. It is tempting to assign the synthesis of  
340 3OHC10, 3OHC12-HSL and 3OC12-HSL to 6N2 TraI2. It has to be considered that an  
341 enzyme can be involved in the production of more than one AHL [17]. To date, the only  
342 *Agrobacterium* LuxI homolog characterized with a QS2 architecture is *A. vitis* AvsI,  
343 involved in the production of multiple long chain-AHLs [18]. AtxR, SolR and RhiR are  
344 also present in strain C58 [19], though their role in QS have not been evaluated. AviR, a  
345 SolR homolog, is a key regulator of the pathogenesis in *A. vitis* [20,21]. A number of three  
346 LuxR orphans (i.e., LuxR homologs unpaired to LuxI homologs) in *A. tumefaciens* 6N2 is  
347 comparable to some of the strains mentioned in this manuscript (2 LuxR orphans in *A.*  
348 *arsenijevicii* KFB330; 3 in *A. tumefaciens* S2, *A. tumefaciens* S33, *A. radiobacter*  
349 DSM30147 and *A. fabrum* C58; 4 in SUL3, *A. fabacearum* P4 and *A. deltaense* RV3; 5 in  
350 *A. tumefaciens* 5A; 6 in *A. deltaense* NCPPB1641).

351 The lack of similar mechanisms to 6N2 QS1 in linear chromosomes of other agrobacteria,  
352 could be associated to the plasticity of these replicons. Also tQS is in a regions of genome  
353 plasticity and predicted in an ICE element. This fact could be related to the truncated nature  
354 of *cinI<sub>t</sub>*. It is plausible that this truncated QS system is a remnant of a duplication and  
355 inversion event, without activity. Additionally, the putative *CinI<sub>t</sub>* is only 151 residues long,  
356 meaning a lack of 103 residues in the *N*-terminus in comparison to CinI. However, a  
357 truncated *luxI* homolog in *Methylobacterium extorquens* AM1 [22], controls the AM1 QS  
358 systems.

359 Considering that agrobacterial QS systems are usually involved in plasmid conjugation  
360 [13,23,24], their localization in the linear chromosome of strain 6N2 open the question



361 about their functions. Several 6N2 proteins regulated by QS are related to conjugative  
362 functions: Pilus assembly protein, Conjugal Transfer Protein D and Mobilization Protein C.  
363 It is plausible that the 6N2 QS activity is involved in the conjugation of other genetic  
364 elements, though they could also be remnants of an integration event of a conjugative  
365 plasmid. The C58 linear chromosome also harbors homologs suggested to participate in the  
366 mobilization of part of the chromosome [25]. To note, a mobile element of 228,159 bp  
367 (coordinates 712,734-940,892), encompassing tQS, QS2 and the T4SS is predicted in the  
368 linear chromosome. It is possible that 6N2 QS systems also modify the bacterial  
369 metabolism, considering the proteins under the influence of the QS activity, related to  
370 energy production and conversion, amino acid transport and metabolism, transport of ions  
371 and small molecules. It remains to be elucidated whether this regulation is exerted directly  
372 through the LuxR homolog(s), or through other regulatory proteins found regulated by the  
373 6N2 QS activity.

374 The finding that *M. guilliermondii* 6N alters the bacterial proteome is not surprising. It is  
375 now clear that the co-cultivation of different species activates gene clusters otherwise  
376 silenced, and vice versa, a process driven by chemical and physical interactions [26]. Most  
377 astonishing is the modification of the 6N2 QS regulation in co-culture with the yeast:  
378 several proteins remain regulated by QS independently of *M. guilliermondii* 6N, but others  
379 are affected by the yeast. The 7 common proteins in 6N2<sup>QSCO</sup><sub>up</sub> and 6N2<sup>QSPR</sup><sub>up</sub> could be  
380 attributed to a direct QS regulation, while the others could be indirect or susceptible of  
381 modification by an environmental factor like the presence of the yeast. To note, three of  
382 these common proteins (Hypothetical protein AT6N2\_L0851, Pilus assembly protein  
383 AT6N2\_L0856 and Conjugal Transfer Protein D AT6N2\_L0857) are coded between QS2  
384 and tQS. As mentioned before (see Modulation of *A. tumefaciens* strain 6N2 proteome by



385 QS), the Pilus assembly protein and the Conjugal Transfer Protein D have been related to  
386 the conjugal transfer of pAt in *A. tumefaciens* strain P4. Other three of them (Autoinducer  
387 binding domain-containing protein CinX AT6N2\_L1344, TauD/TfdA family dioxygenase  
388 AT6N2\_L1355 and ABC transporter substrate-binding protein AT6N2\_L1359) are coded  
389 close to QS1.

390 This accompanying microorganism could degrade, metabolize or modify the QS signals  
391 modulating in consequence the QS activity [27]. However, it is unlikely that the  
392 modification in the 6N2 QS regulation can be attributed to a fungal inactivation of QS  
393 signals. Even though QQ is prevalent in yeasts, *M. guilliermondii* 6N exhibits only a weak  
394 capacity for inactivating AHLs [10]. Probably other mechanisms take part in the *M.*  
395 *guilliermondii* 6N-*A. tumefaciens* 6N2 interactions and the subsequent alteration of the QS  
396 regulation, as described in oral biofilms, where cell-cell contacts and production or  
397 depletion of metabolites intervene in the establishment of microbial communities [28].  
398 Indeed, some QS-regulated proteins are related to the transport and metabolism of ions and  
399 metabolites, as mentioned above. A recent report presented a model showing how an  
400 environmental cue, through dedicated regulators, act on QS signals or signal receptors  
401 modulating the gene expression [29]. Particular attention deserve the prophage 16-3  
402 proteins identified in 6N2<sup>QSCO</sup><sub>dw</sub> subgroup, since this is in concordance with the  
403 “piggyback-the-winner” theory, which predicts a lysogenic switching at high cell densities  
404 [30]. The relationship between QS and lysogeny has been proven for the induction of the  
405 lytic cycle of  $\Phi$ H2O [31]. Our proteomic results suggest that, in addition to QS, other  
406 environmental factors, like the simultaneous presence of other microorganism, could  
407 influence the phage cycle.

408 First described in the *Pseudomonas aeruginosa-Candida albicans* interactions, it is now  
409 clear that QS molecules not only influence the physiology of the signaling microorganism  
410 but also that of surroundings microorganisms [32,33]. In this work, we describe for the first  
411 time the alteration of a yeast proteome by the bacterial QS activity. It is probable that the  
412 AHLs, absent or strongly diminished in the co-culture with *A. tumefaciens* (pME6863),  
413 have a direct effect on the yeast. Although no AHL receptor has been described in  
414 eukaryotic cells, these molecules can interact with biological membranes modifying the  
415 dipole potential [34]. An indirect mechanism is also possible for this modification of the  
416 fungal proteome: a QS-mediated alteration of the bacterial physiology could modify the  
417 profile of metabolites in the culture medium, altering the fungal proteome. Both direct and  
418 indirect mechanisms are not mutually exclusive. Beyond the mechanism that modulates the  
419 yeast proteome, it is to note that relevant events are being modified. For instance, a RAS  
420 domain-containing protein (A5DKQ9), an E3 ubiquitin-protein ligase (A5DL67) and an E2  
421 ubiquitin-conjugating enzyme (A5DL67) in Y6N<sup>QS+</sup><sub>up</sub> subgroup, and an USP domain-  
422 containing protein (A5DNC6) and protein FYV10 (A5DFE2) in Y6N<sup>QS+</sup><sub>dw</sub> suggest an up-  
423 regulation of an ubiquitylation process, less prevalent when the QS activity is attenuated  
424 [35,36]. In agreement, protein metabolism is one of the main terms in BP ontology showing  
425 differences between Y6N<sup>QS+</sup><sub>up</sub> and Y6N<sup>QS-</sup><sub>up</sub>. In contrast, a vacuolar proton pump subunit B  
426 (A5DEC0), a vacuolar protein sorting-associated protein (A5DHU0) and a V-type proton  
427 ATPase subunit (A5DLL8) identified in Y6N<sup>QS-</sup><sub>up</sub>, together with the the GO term “vacuole”  
428 in CC ontology put the focus in this organelle, key compartment in the fungal cell [37].  
429 Though focused in an *in vitro* description, our results indicate the importance of the *in*  
430 *planta* characterization of the *A. tumefaciens* 6N2 QS system, for evaluating its ecological  
431 and physiological relevance, including its role in growth and survival. The complete

432 elucidation of the mechanism beneath the *A. tumefaciens* 6N2-*M. guilliermondii* 6N  
433 interactions requires the consideration of the QS-influenced proteins, those guided by the  
434 presence of the second microorganism and, importantly, also those whose abundances are  
435 constant. However, results presented in this report allow a first insight to the complexity of  
436 the interactions between these two microorganisms.

437

## 438 **Materials and methods**

439 **Microorganisms and growth conditions.** *A. tumefaciens* 6N2 and *M. guilliermondii* 6N  
440 were cultured at 30 °C in nutrient broth (NB) (peptone 5 g L<sup>-1</sup>; yeast extract 3 g L<sup>-1</sup>).  
441 *Escherichia coli* DH5α harboring plasmids pME6000 [38] or pME6863 [14] were cultured  
442 in Luria Bertani broth at 37 °C. When required, media were supplemented with agar, 15 g  
443 L<sup>-1</sup>, ampicillin 100 µg mL<sup>-1</sup>, tetracycline 15 µg mL<sup>-1</sup> or cycloheximide 50 µg mL<sup>-1</sup>.

444

445 **AHL identification.** Five hundred mL of NB broth were inoculated with an overnight  
446 culture of *A. tumefaciens* 6N2, and incubated aerobically at 30 °C for 24 h until late  
447 exponential growth phase. Supernatants were extracted twice with acidified ethyl acetate  
448 [39]. Concentrated extracts were analyzed by UPLC/ESI MS/MS (Waters Acquity UPLC-  
449 TQD) with an Acquity HSS C18 (2.1 mm × 50 mm; 1.8 µm) at 20 °C with a flow of 0.6 mL  
450 min<sup>-1</sup> and a gradient of 10% acetonitrile with 0.1% formic acid to 100% acetonitrile with  
451 0.1% formic acid in 5 min as mobile phase. AHL identifications were performed by  
452 comparison of fragmentation patterns with those of commercial AHLs [39].

453

454 **Genomic sequencing and annotation.** *A. tumefaciens* 6N2 genomic DNA was extracted  
455 from a 10 mL overnight culture. Genome sequence was obtained utilizing single-molecule

456 real-time sequencing technology (Pacific Biosciences) (see Supp. Materials for details).  
457 Annotation was performed with the MicroScope platform [40] and BASys [41]. For the  
458 identification of QS genes, BLAST searches were performed on strain 6N2 genome  
459 utilizing as query the *traI* and *traR* of *A. fabrum* C58 and related microorganisms (see  
460 Supp. Materials for details). Sequences were deposited in Genbank under accession  
461 numbers CP072308 and CP072309.

462

463 **Attenuation of QS activity.** A quorum quenching (QQ) strategy was developed, using the  
464 vector pME6863 [14] that allows the constitutive expression of the *Bacillus* spp. AiiA  
465 lactonase. The vector was conjugated from DH5 $\alpha$  (pME6863) into strain 6N2 in a  
466 triparental mating with *E. coli* DH5 $\alpha$  (pRK2013) [42] on LB agar plates for 24 h at 30 °C.  
467 pME6000 [38] was independently conjugated as negative control. Transconjugants were  
468 selected on LB agar supplemented with ampicillin and tetracycline. To confirm the QQ  
469 strategy, organic extracts were analyzed by RP-TLC using *A. tumefaciens* NT1 (pZLR4) as  
470 bioreporter strain [43,44].

471

472 **Pathogenicity assays.** Crown gall tumor formation was assessed on tomato and  
473 *Arabidopsis thaliana* plants. *A. tumefaciens* strain 6N2 was cultured on NB agar for 48 h,  
474 cells were aseptically scraped off and resuspended in sterile water at a final density of 10<sup>7</sup>  
475 CFU mL<sup>-1</sup>. Cell suspension was inoculated in 4-cm cuts between the first and second node  
476 on the stems of young tomato plants. *A. thaliana* was inoculated below the first node.  
477 Plants were incubated 2 weeks at 25 °C under 16 h illumination and inspected for the  
478 apparition of tumors. *A. fabrum* C58 and sterile water were utilized as positive and negative  
479 controls.

480

481 **Preparation of protein extracts and proteomic analysis.** Two hundred and fifty mL  
482 flasks containing 20 mL of NB broth were inoculated at an initial concentration of  $\sim 10^7$   
483 CFU mL<sup>-1</sup> for *A. tumefaciens* 6N2 (pME6000) or *A. tumefaciens* 6N2 (pME6863), and  $\sim 10^6$   
484 CFU mL<sup>-1</sup> for *M. guilliermondii* 6N. Dual cultures of *A. tumefaciens* 6N2 (pME6000) plus  
485 the yeast, and *A. tumefaciens* 6N2 (pME6863) plus the yeast, were prepared with those cell  
486 densities. Flasks were incubated aerobically at 30 °C for 24 h until late exponential growth  
487 phase. Protein extracts were obtained using the YPX extraction kit (EXPEDEON), and  
488 concentrations were determined with the QuantiPro BCA (SigmaAldrich). Three  
489 independent samples were analyzed for each pure or mixed culture. Protein samples were  
490 trypsin digested and peptide mixtures were analyzed by a Q-Exactive mass spectrometer  
491 coupled to an Easy-nLC system (both from Thermo Scientific). All MS/MS data were  
492 processed with Proteome Discoverer 2.1 (Thermo Scientific) coupled to an in-house  
493 Mascot search server (Matrix Science, Boston, MA; version 2.5.1). Proteins showing a fold  
494 change (FC)  $\geq 1.5$  and an ANOVA  $p \leq 0.05$  were considered as differentially accumulated  
495 (see Supp. Materials for details). Complete datasets are available in the ProteomeXchange  
496 Consortium via the PRIDE [45] partner repository with the identifier PXD025730.

497

#### 498 **Conflict of interest**

499 None of the authors have any type of conflict of interest.

500

#### 501 **Acknowledgement**

502 This work was supported by the Consejo Nacional de Investigaciones Científicas y  
503 Técnicas (CONICET, PIP 2015 N°0946, PU-E22920160100012CO), Agencia Nacional de

504 Promoción Científica y Tecnológica (PICT 2016 N° 0532; PICT 2016 N° 2013), and  
505 Secretaría de Ciencia, Arte e Innovación Tecnológica from the Universidad Nacional de  
506 Tucumán (PIUNT D609). Kok-Gan Chan thanks the financial support from the University  
507 of Malaya (FRGS grant no. FP022-2018A). Carlos Nieto-Peñalver thanks the support from  
508 Université Paris Diderot through the Alicia Moreau Chair.

509

## 510 **References**

- 511 [1] J. Mansfield, S. Genin, S. Magori, V. Citovsky, M. Sriariyanum, P. Ronald, M. Dow,  
512 V. Verdier, S. V Beer, M.A. Machado, I. Toth, G. Salmond, G.D. Foster, Top 10  
513 plant pathogenic bacteria in molecular plant pathology., *Mol. Plant Pathol.* 13 (2012)  
514 614–29. <https://doi.org/10.1111/j.1364-3703.2012.00804.x>.
- 515 [2] F. Lassalle, T. Campillo, L. Vial, J. Baude, D. Costechareyre, D. Chapulliot, M.  
516 Shams, D. Abrouk, C. Lavire, C. Oger-Desfeux, F. Hommais, L. Guéguen, V.  
517 Daubin, D. Muller, X. Nesme, Genomic species are ecological species as revealed by  
518 comparative genomics in *Agrobacterium tumefaciens*, *Genome Biol. Evol.* 3 (2011)  
519 762–781. <https://doi.org/10.1093/gbe/evr070>.
- 520 [3] Y. Dessaux, D. Faure, Quorum sensing and quorum quenching in *Agrobacterium*: A  
521 “Go/No Go system”?, *Genes* (Basel). 9 (2018) 210.  
522 <https://doi.org/10.3390/genes9040210>.
- 523 [4] C. Fuqua, S. Winans, E. Greenberg, Census and consensus in bacterial ecosystems:  
524 the LuxR-LuxI family of quorum-sensing transcriptional regulators, *Annu. Rev.*  
525 *Microbiol.* 50 (1996) 727–751.
- 526 [5] C. Fuqua, E.P. Greenberg, Listening in on bacteria: acyl-homoserine lactone  
527 signalling., *Nat. Rev. Mol. Cell Biol.* 3 (2002) 685–695.

- 528 <https://doi.org/10.1038/nrm907>.
- 529 [6] I. Hwang, P.L. Li, L. Zhang, K.R. Piper, D.M. Cook, M.E. Tate, S.K. Farrand, TraI,  
530 a LuxI homologue, is responsible for production of conjugation factor, the Ti  
531 plasmid *N*-acylhomoserine lactone autoinducer., Proc. Natl. Acad. Sci. 91 (1994)  
532 4639–4643. <https://doi.org/10.1073/pnas.91.11.4639>.
- 533 [7] K.M. Pappas, S.C. Winans, A LuxR-type regulator from *Agrobacterium tumefaciens*  
534 elevates Ti plasmid copy number by activating transcription of plasmid replication  
535 genes, Mol. Microbiol. 48 (2003) 1059–1073. [https://doi.org/10.1046/j.1365-](https://doi.org/10.1046/j.1365-2958.2003.03488.x)  
536 [2958.2003.03488.x](https://doi.org/10.1046/j.1365-2958.2003.03488.x).
- 537 [8] Y.-X. Xing, C.-Y. Wei, Y. Mo, L.-T. Yang, S.-L. Huang, Y.-R. Li, Nitrogen-fixing  
538 and plant growth-promoting ability of two endophytic bacterial strains isolated from  
539 sugarcane stalks, Sugar Tech. 18 (2016) 373–379. [https://doi.org/10.1007/s12355-](https://doi.org/10.1007/s12355-015-0397-7)  
540 [015-0397-7](https://doi.org/10.1007/s12355-015-0397-7).
- 541 [9] M. Fan, Z. Liu, L. Nan, E. Wang, W. Chen, Y. Lin, G. Wei, Isolation,  
542 characterization, and selection of heavy metal-resistant and plant growth-promoting  
543 endophytic bacteria from root nodules of *Robinia pseudoacacia* in a Pb/Zn mining  
544 area, Microbiol. Res. 217 (2018) 51–59.  
545 <https://doi.org/10.1016/j.micres.2018.09.002>.
- 546 [10] A.C.D. V Leguina, C. Nieto, H.F. Pajot, E. V Bertini, W. Mac Cormack, L.I.  
547 Castellanos de Figueroa, C.G. Nieto-Peñalver, Inactivation of bacterial quorum  
548 sensing signals *N*-acyl homoserine lactones is widespread in yeasts., Fungal Biol.  
549 122 (2018) 52–62. <https://doi.org/10.1016/j.funbio.2017.10.006>.
- 550 [11] E. V. Bertini, Importancia de los mecanismos de *quorum sensing* en las interacciones  
551 entre microorganismos endofíticos. PhD Thesis. Universidad Nacional de Tucumán,

- 552 2018.
- 553 [12] E.V. Bertini, A.C. del V. Leguina, L.I. Castellanos de Figueroa, C.G. Nieto-  
554 Peñalver, Endophytic microorganisms *Agrobacterium tumefaciens* 6N2 and  
555 *Meyerozyma guilliermondii* 6N serve as models for the study of microbial  
556 interactions in colony biofilms, *Rev. Argent. Microbiol.* (2019).  
557 <https://doi.org/10.1016/j.ram.2018.09.006>.
- 558 [13] N. Mhedbi-Hajri, N. Yahiaoui, S. Mondy, N. Hue, F. Péliissier, D. Faure, Y.  
559 Dessaux, Transcriptome analysis revealed that a quorum sensing system regulates  
560 the transfer of the pAt megaplasmid in *Agrobacterium tumefaciens*, *BMC Genomics*.  
561 17 (2016) 661. <https://doi.org/10.1186/s12864-016-3007-5>.
- 562 [14] C. Reimann, N. Ginet, L. Michel, C. Keel, P. Michaux, V. Krishnapillai, M. Zala,  
563 K. Heurlier, D. Haas, K. Triandafillu, H. Harms, Genetically programmed  
564 autoinducer destruction reduces virulence gene expression and swarming motility in  
565 *Pseudomonas aeruginosa* PAO1, *Microbiology*. 148 (2002) 923–932.
- 566 [15] M. Cleene, The susceptibility of monocotyledons to *Agrobacterium tumefaciens*, *J.*  
567 *Phytopathol.* 113 (1985) 81–89. <https://doi.org/10.1111/j.1439-0434.1985.tb00829.x>.
- 568 [16] G. Suen, B.S. Goldman, R.D. Welch, Predicting prokaryotic ecological niches using  
569 genome sequence analysis., *PLoS One*. 2 (2007) e743.  
570 <https://doi.org/10.1371/journal.pone.0000743>.
- 571 [17] N. Calatrava-Morales, M. McIntosh, M.J. Soto, Regulation mediated by *N*-acyl  
572 homoserine lactone quorum sensing signals in the *Rhizobium*-legume symbiosis.,  
573 *Genes (Basel)*. 9 (2018) 263. <https://doi.org/10.3390/genes9050263>.
- 574 [18] G. Hao, T.J. Burr, Regulation of long-chain *N*-acyl-homoserine lactones in  
575 *Agrobacterium vitis*, *J. Bacteriol.* 188 (2006) 2173–83.



- 576 <https://doi.org/10.1128/JB.188.6.2173-2183.2006>.
- 577 [19] S. Slater, J.C. Setubal, B. Goodner, K. Houmiel, J. Sun, R. Kaul, B.S. Goldman, S.K.  
578 Farrand, N. Almeida, T. Burr, E. Nester, D.M. Rhoads, R. Kadoi, T. Ostheimer, N.  
579 Pride, A. Sabo, E. Henry, E. Telepak, L. Cromes, A. Harkleroad, L. Oliphant, P.  
580 Pratt-Szegila, R. Welch, D. Wood, Reconciliation of sequence data and updated  
581 annotation of the genome of *Agrobacterium tumefaciens* C58, and distribution of a  
582 linear chromosome in the genus *Agrobacterium*, *Appl. Environ. Microbiol.* 79  
583 (2013) 1414–1417. <https://doi.org/10.1128/AEM.03192-12>.
- 584 [20] D. Zheng, H. Zhang, S. Carle, G. Hao, M.R. Holden, T.J. Burr, A *luxR* homolog,  
585 *aviR*, in *Agrobacterium vitis* is associated with induction of necrosis on grape and a  
586 hypersensitive response on tobacco., *Mol. Plant-Microbe Interact.* 16 (2003) 650–8.  
587 <https://doi.org/10.1094/MPMI.2003.16.7.650>.
- 588 [21] S. Süle, L. Cursino, D. Zheng, H.C. Hoch, T.J. Burr, Surface motility and associated  
589 surfactant production in *Agrobacterium vitis*, *Lett. Appl. Microbiol.* 49 (2009) 596–  
590 601. <https://doi.org/10.1111/j.1472-765X.2009.02716.x>.
- 591 [22] C.G. Nieto Penalver, F. Cantet, D. Morin, D. Haras, J.A. Vorholt, A plasmid-borne  
592 truncated *luxI* homolog controls quorum-sensing systems and extracellular  
593 carbohydrate production in *Methylobacterium extorquens* AM1, *J. Bacteriol.* 188  
594 (2006) 7321–4. <https://doi.org/10.1128/JB.00649-06>.
- 595 [23] C. Wang, C. Yan, C. Fuqua, L.-H. Zhang, Identification and characterization of a  
596 second quorum-sensing system in *Agrobacterium tumefaciens* A6, *J. Bacteriol.* 196  
597 (2014) 1403–1411. <https://doi.org/10.1128/JB.01351-13>.
- 598 [24] M.E. Wetzal, K.-S. Kim, M. Miller, G.J. Olsen, S.K. Farrand, Quorum-dependent  
599 mannopine-inducible conjugative transfer of an *Agrobacterium* opine-catabolic

- 600 plasmid, *J. Bacteriol.* 196 (2014) 1031–1044. <https://doi.org/10.1128/JB.01365-13>.
- 601 [25] L. Leloup, E.-M. Lai, C. Kado, Identification of a chromosomal *tra*-like region in  
602 *Agrobacterium tumefaciens*, *Mol. Genet. Genomics.* 267 (2002) 115–123.  
603 <https://doi.org/10.1007/s00438-002-0646-9>.
- 604 [26] T. Netzker, J. Fischer, J. Weber, D.J. Mattern, C.C. König, V. Valiante, V.  
605 Schroeckh, A.A. Brakhage, Microbial communication leading to the activation of  
606 silent fungal secondary metabolite gene clusters., *Front. Microbiol.* 6 (2015) 299.  
607 <https://doi.org/10.3389/fmicb.2015.00299>.
- 608 [27] C. Grandclément, M. Tannières, S. Moréra, Y. Dessaux, D. Faure, Quorum  
609 quenching: role in nature and applied developments., *FEMS Microbiol. Rev.* 40  
610 (2016) 86–116. <https://doi.org/10.1093/femsre/fuv038>.
- 611 [28] C.J. Wright, L.H. Burns, A.A. Jack, C.R. Back, L.C. Dutton, A.H. Nobbs, R.J.  
612 Lamont, H.F. Jenkinson, Microbial interactions in building of communities., *Mol.*  
613 *Oral Microbiol.* 28 (2013) 83–101. <https://doi.org/10.1111/omi.12012>.
- 614 [29] E. V Stabb, Could positive feedback enable bacterial pheromone signaling to  
615 coordinate behaviors in response to heterogeneous environmental cues?, *MBio.* 9  
616 (2018). <https://doi.org/10.1128/mBio.00098-18>.
- 617 [30] C.B. Silveira, F.L. Rohwer, Piggyback-the-Winner in host-associated microbial  
618 communities., *NPJ Biofilms Microbiomes.* 2 (2016) 16010.  
619 <https://doi.org/10.1038/npjbiofilms.2016.10>.
- 620 [31] D. Tan, M.F. Hansen, L.N. de Carvalho, H.L. Røder, M. Burmølle, M. Middelboe, S.  
621 Lo Svenningsen, High cell densities favor lysogeny: induction of an H20 prophage is  
622 repressed by quorum sensing and enhances biofilm formation in *Vibrio*  
623 *anguillarum*., *ISME J.* 14 (2020) 1731–1742. <https://doi.org/10.1038/s41396-020->

- 624 0641-3.
- 625 [32] D. a Hogan, A. Vik, R. Kolter, A *Pseudomonas aeruginosa* quorum-sensing  
626 molecule influences *Candida albicans* morphology., *Mol. Microbiol.* 54 (2004)  
627 1212–23. <https://doi.org/10.1111/j.1365-2958.2004.04349.x>.
- 628 [33] C. Boon, Y. Deng, L.-H. Wang, Y. He, J.-L. Xu, Y. Fan, S.Q. Pan, L.-H. Zhang, A  
629 novel DSF-like signal from *Burkholderia cenocepacia* interferes with *Candida*  
630 *albicans* morphological transition., *ISME J.* 2 (2008) 27–36.  
631 <https://doi.org/10.1038/ismej.2007.76>.
- 632 [34] B.M. Davis, R. Jensen, P. Williams, P. O’Shea, The interaction of *N*-acylhomoserine  
633 lactone quorum sensing signaling molecules with biological membranes:  
634 implications for inter-kingdom signaling., *PLoS One.* 5 (2010) e13522.  
635 <https://doi.org/10.1371/journal.pone.0013522>.
- 636 [35] F.E. Reyes-Turcu, K.H. Ventii, K.D. Wilkinson, Regulation and cellular roles of  
637 ubiquitin-specific deubiquitinating enzymes., *Annu. Rev. Biochem.* 78 (2009) 363–  
638 397. <https://doi.org/10.1146/annurev.biochem.78.082307.091526>.
- 639 [36] H.G. Dohlman, S.L. Campbell, Regulation of large and small G proteins by  
640 ubiquitination., *J. Biol. Chem.* 294 (2019) 18613–18623.  
641 <https://doi.org/10.1074/jbc.REV119.011068>.
- 642 [37] S.C. Li, P.M. Kane, The yeast lysosome-like vacuole: endpoint and crossroads.,  
643 *Biochim. Biophys. Acta.* 1793 (2009) 650–63.  
644 <https://doi.org/10.1016/j.bbamcr.2008.08.003>.
- 645 [38] M. Maurhofer, C. Reimann, P. Schmidli-Sacherer, S. Heeb, D. Haas, G. Défago,  
646 Salicylic acid biosynthetic genes expressed in *Pseudomonas fluorescens* strain P3  
647 improve the induction of systemic resistance in tobacco against Tobacco Necrosis

- 648 Virus, Phytopathology. 88 (1998) 678–684.  
649 <https://doi.org/10.1094/PHYTO.1998.88.7.678>.
- 650 [39] P.D. Shaw, G. Ping, S.L. Daly, C. Cha, J.E. Cronan, K.L. Rinehart, S.K. Farrand,  
651 Detecting and characterizing *N*-acyl-homoserine lactone signal molecules by thin-  
652 layer chromatography., Proc. Natl. Acad. Sci. U. S. A. 94 (1997) 6036–41.  
653 <https://doi.org/10.1073/pnas.94.12.6036>.
- 654 [40] D. Vallenet, E. Belda, A. Calteau, S. Cruveiller, S. Engelen, A. Lajus, F. Le Fèvre,  
655 C. Longin, D. Mornico, D. Roche, Z. Rouy, G. Salvignol, C. Scarpelli, A.A. Thil  
656 Smith, M. Weiman, C. Médigue, MicroScope--an integrated microbial resource for  
657 the curation and comparative analysis of genomic and metabolic data., Nucleic Acids  
658 Res. 41 (2013) D636–D647. <https://doi.org/10.1093/nar/gks1194>.
- 659 [41] G.H. Van Domselaar, P. Stothard, S. Shrivastava, J.A. Cruz, A. Guo, X. Dong, P.  
660 Lu, D. Szafron, R. Greiner, D.S. Wishart, BASys: a web server for automated  
661 bacterial genome annotation., Nucleic Acids Res. 33 (2005) W455–W459.  
662 <https://doi.org/10.1093/nar/gki593>.
- 663 [42] D.H. Figurski, D.R. Helinski, Replication of an origin-containing derivative of  
664 plasmid RK2 dependent on a plasmid function provided in trans., Proc. Natl. Acad.  
665 Sci. U. S. A. 76 (1979) 1648–1652. <https://doi.org/10.1073/pnas.76.4.1648>.
- 666 [43] C. Cha, P. Gao, Y.C. Chen, P.D. Shaw, S.K. Farrand, Production of acyl-homoserine  
667 lactone quorum-sensing signals by gram-negative plant-associated bacteria., Mol.  
668 Plant-Microbe Interact. 11 (1998) 1119–1129.  
669 <https://doi.org/10.1094/MPMI.1998.11.11.1119>.
- 670 [44] L. Ravn, A.B. Christensen, S. Molin, M. Givskov, L. Gram, Methods for detecting  
671 acylated homoserine lactones produced by Gram-negative bacteria and their

672 application in studies of AHL-production kinetics, *J. Microbiol. Methods*. 44 (2001)  
673 239–251. [https://doi.org/10.1016/S0167-7012\(01\)00217-2](https://doi.org/10.1016/S0167-7012(01)00217-2).  
674 [45] Y. Perez-Riverol, A. Csordas, J. Bai, M. Bernal-Llinares, S. Hewapathirana, D.J.  
675 Kundu, A. Inuganti, J. Griss, G. Mayer, M. Eisenacher, E. Pérez, J. Uszkoreit, J.  
676 Pfeuffer, T. Sachsenberg, Ş. Yılmaz, S. Tiwary, J. Cox, E. Audain, M. Walzer, A.F.  
677 Jarnuczak, T. Ternent, A. Brazma, J.A. Vizcaíno, The PRIDE database and related  
678 tools and resources in 2019: improving support for quantification data, *Nucleic*  
679 *Acids Res.* 47 (2019) D442–D450. <https://doi.org/10.1093/nar/gky1106>.

680

681

682

683 Figure 1. Pathogenesis tests on model plants. *A. tumefaciens* 6N2 did not develop the  
684 characteristic tumors on tomato (B) and *A. thaliana* (D) plants. A and C show the  
685 corresponding controls with *A. fabrum* C58.

686

687 Figure 2. Mass spectrometric identification of AHLs produced by *A. tumefaciens* 6N2. The  
688 analysis of supernatant extracts showed the presence of molecules of  $[M+H]^+$  244.4 (A),  
689 272.5 (B), 298.6 (C) and 300.6 (D) m/z compatible with OHC8-HSL, OHC10-HSL, OC12-  
690 HSL and OHC12-HSL, respectively. In all the cases, the fragmentation produced a  
691 characteristic  $[M+H]^+$  of 102 m/z. See structures in Suppl. Fig. 1.

692

693 Figure 3. Circular representation of *A. tumefaciens* 6N2 genome. In the circular (A)  
694 chromosome, from outer to inner are represented CDS in each strand (blue), GC skew  
695 (green and red), GC content (black), genomic islands (blue) and the luxR orthologs *rhiR*,

696 *atxR* and *solR* (red, clockwise sense). In the linear (B) chromosome, are represented CDS in  
697 each strand (blue), GC skew (green and red), GC content (black), genomic islands predicted  
698 with Islanviewer and ICEs predicted with ICEfinder (blue and green), T4SS and T6SS (red  
699 and cyan), and the tQS, QS2 and QS1 (red, clockwise sense). Black triangles indicate the  
700 extreme of the linear chromosome.

701

702 Figure 4. Architecture and topology of *A. tumefaciens* 6N2 QS systems based on AHL  
703 signals. In the linear chromosome, QS1 composed of *cinR*, *cinI* and *cinX*, and QS2  
704 composed of *traI2* and *traR2* were identified. A truncated tQS system composed of *cinX*  
705 and a truncated version of *cinI* apparently arose from a partial duplication and inversion of  
706 QS1. Respective coordinates are shown. Figure was prepared with SimpleSinteny software.

707

708 Figure 5. Summary of proteomic analysis of *A. tumefaciens* 6N2 and *M. guilliermondii* 6N.  
709 Venn diagrams shows bacterial (A) and yeast subgroups of proteins. In 6N2, 7 common  
710 AHL-based QS-regulated proteins were found in the 6N2<sup>QSPR<sub>up</sub></sup> and 6N2<sup>QSCO<sub>up</sub></sup> subgroups.  
711 In the yeast, 184 differentially accumulated proteins (98+86) were attributed to the  
712 presence of the bacterium, with independence of the QS activity. Venn diagram was  
713 prepared with Venny web program (<https://bioinfogp.cnb.csic.es/tools/venny/index.html>).

714

715 Suppl. Figure 1. Acyl homoserine lactones produced by *A. tumefaciens* 6N2. UPLC/ESI  
716 MS/MS analysis allowed the identification of *N*-3-hydroxy-octanoyl-homoserine lactone  
717 (OHC8-HSL), *N*-3-hydroxy-decanoyl-homoserine lactone (OHC10-HSL), *N*-3-oxo-  
718 dodecanoyl-homoserine lactone (OC12-HSL) and *N*-3-hydroxy-dodecanoyl-homoserine  
719 lactone (OHC12-HSL).

720

721 Suppl. Figure 2. Conservation of synteny around the *A. tumefaciens* 6N2 QS systems  
722 related to AHLs. Synteny upstream QS1 (A) spans 16200 bp and is shared by the  
723 *Agrobacterium* strains 5A, P4, RV3, NCCPB1641 and DSM30147. Syntenies around *atxR*  
724 (B), *solR* (C) and *rhiR* (D) span 235500 bp, 785000 bp, and 98000 bp, respectively, and can  
725 be identified in all the strains analyzed. Due to the length of the sequences, only part of the  
726 synteny is shown. Respective 6N2 coordinates are shown. Analysis were performed with  
727 SimpleSinteny software.

728

729 Suppl. Figure 3A. Similarities among *Agrobacterium* LuxI orthologs. 6N2 orthologs are  
730 indicated with the corresponding protein name. Orthologs of other strains are indicated with  
731 the corresponding Genbank accession number. Identity matrix constructed with BioEdit  
732 was visualized as a heatmap with MORPHEUS. Identity values are indicated in each  
733 square. Low identities are represented with orange-red shades; high identities are with  
734 green shades; medium identities are in yellow (see scale bar).

735

736 Suppl. Figure 3B. Similarities among *Agrobacterium* LuxR orthologs. 6N2 orthologs are  
737 indicated with the corresponding protein name. Orthologs of other strains are indicated with  
738 the corresponding Genbank accession number. Identity matrix constructed with BioEdit  
739 was visualized as a heatmap with MORPHEUS. Identity values are indicated in each  
740 square. Low identities are represented with orange-red shades; high identities are with  
741 green shades; medium identities are in yellow (see scale bar).

742

743 Suppl. Figure 4. Attenuation of QS activity in *A. tumefaciens* 6N2. Concentrated extracts of  
744 *A. tumefaciens* 6N2 (pME6000) and *A. tumefaciens* 6N2 (pME6863) were analyzed by RP-  
745 TLC utilizing MeOH:H<sub>2</sub>O (6:4) as mobile phase. 3OHC8-HSL (4 pmol), 3OHC10-HSL  
746 (0.25 nmol) and 3OHC12-HSL (2.5 nmol) were utilized as standards (Stds).

747

748 Suppl. Figure 5. Functional classification of *A. tumefaciens* 6N2 QS regulated proteins.  
749 6N2<sup>QSPR<sub>up</sub></sup> and 6N2<sup>QSCO<sub>up</sub></sup> subgroups are compared in (A). 6N2<sup>QSPR<sub>dw</sub></sup> and 6N2<sup>QSCO<sub>dw</sub></sup>  
750 subgroups are compared in (B). In each figure, full bars correspond to pure cultures and  
751 dashed bars correspond to cocultures. eggNOG database was utilized for the analysis. C,  
752 Energy production and conversion; E, Amino acid transport and metabolism; F, Nucleotide  
753 transport and metabolism; G, Carbohydrate transport and metabolism; H, Coenzyme  
754 transport and metabolism; I, Lipid transport and metabolism; J, Translation, ribosomal  
755 structure and biogenesis; K, Transcription; L, Replication, recombination and repair; O,  
756 Posttranslational modification, protein turnover, chaperones; P, Inorganic ion transport and  
757 metabolism; Q, Secondary metabolites biosynthesis, transport and catabolism; S, Function  
758 unknown; T, Signal transduction mechanism; U, Intracellular trafficking, secretion, and  
759 vesicular transport; NA, not assigned.

760

761 Suppl. Figure 6. Ontology analysis of differentially accumulated proteins of *A. tumefaciens*  
762 6N2. Figures show the number of bacterial proteins regulated by the QS activity, associated  
763 to the respective GO terms. BP (upper), CC (middle) and MF (lower) ontologies of  
764 bacterial proteins are shown. In each figure, full bars correspond to pure cultures and  
765 dashed bars correspond to cocultures. 6N2<sup>QSPR<sub>up</sub></sup> and 6N2<sup>QSCO<sub>up</sub></sup> are depicted in green (A).  
766 6N2<sup>QSPR<sub>dw</sub></sup> and 6N2<sup>QSCO<sub>dw</sub></sup> are depicted in red (B).



767

768 Suppl. Figure 7. Functional classification of *M. guilliermondii* 6N proteins regulated by  
769 6N2 QS activity. Y6N<sup>QS+</sup><sub>up</sub> and Y6N<sup>QS-</sup><sub>up</sub> subgroups are compared in (A). Y6N<sup>QS+</sup><sub>dw</sub> and  
770 Y6N<sup>QS-</sup><sub>dw</sub> subgroups are compared in (B). In each figure, full bars correspond to cocultures  
771 with *A. tumefaciens* 6N2 (pME6000) and dashed bars correspond to cocultures with *A.*  
772 *tumefaciens* 6N2 (pME6863). eggNOG database was utilized for the analysis. A, RNA  
773 Processing and modification; B, Chromatin structure and dynamics; C, Energy production  
774 and conversion; D, Cell cycle control, cell division, chromosome partitioning; E, Amino  
775 acid transport and metabolism; F, Nucleotide transport and metabolism; G, Carbohydrate  
776 transport and metabolism; H, Coenzyme transport and metabolism; I, Lipid transport and  
777 metabolism; J, Translation, ribosomal structure and biogenesis; K, Transcription; L,  
778 Replication, recombination and repair; M, Cell wall/membrane/envelope biogenesis; O,  
779 Posttranslational modification, protein turnover, chaperones; P, Inorganic ion transport and  
780 metabolism; Q, Secondary metabolites biosynthesis, transport and catabolism; S, Function  
781 unknown; T, Signal transduction mechanism; U, Intracellular trafficking, secretion, and  
782 vesicular transport; Y, Nuclear structure; Z, Cytoskeleton; NA, not assigned.

783

784 Suppl. Figure 8. Ontology analysis of differentially accumulated proteins of *M.*  
785 *guilliermondii* 6N. Figures show the number of yeast proteins influenced by the *A.*  
786 *tumefaciens* 6N2 QS activity, associated to the respective GO terms. BP (upper), CC  
787 (middle) and MF (lower) ontologies of yeast proteins are shown. In each figure, full bars  
788 correspond to cocultures with *A. tumefaciens* 6N2 (pME6000) and dashed bars correspond  
789 to cocultures with *A. tumefaciens* 6N2 (pME6863). Y6N<sup>QS+</sup><sub>up</sub> and Y6N<sup>QS-</sup><sub>up</sub> subgroups are  
790 depicted in brown (A). Y6N<sup>QS+</sup><sub>dw</sub> and Y6N<sup>QS-</sup><sub>dw</sub> subgroups are depicted in blue (B).

791

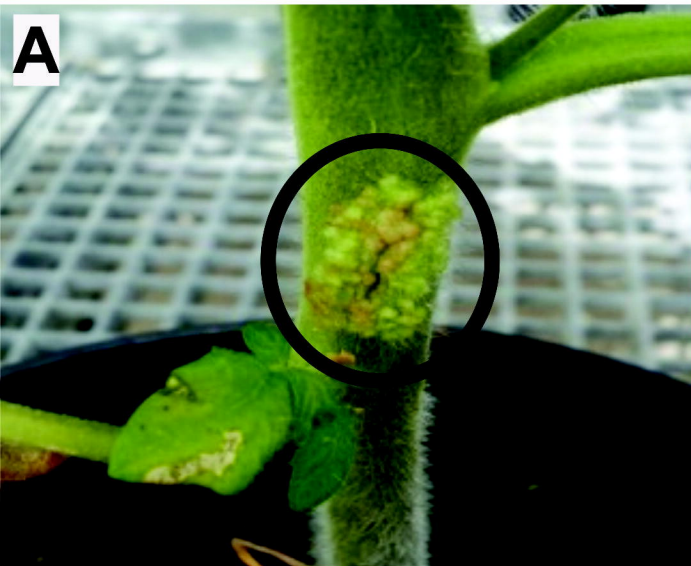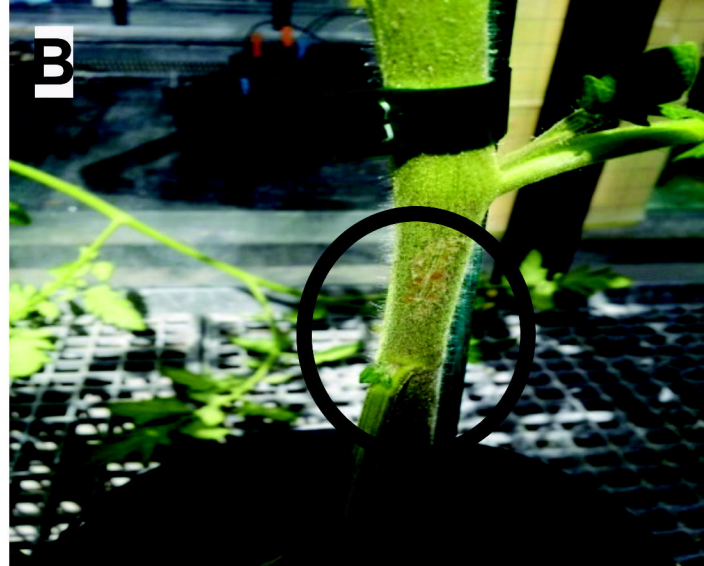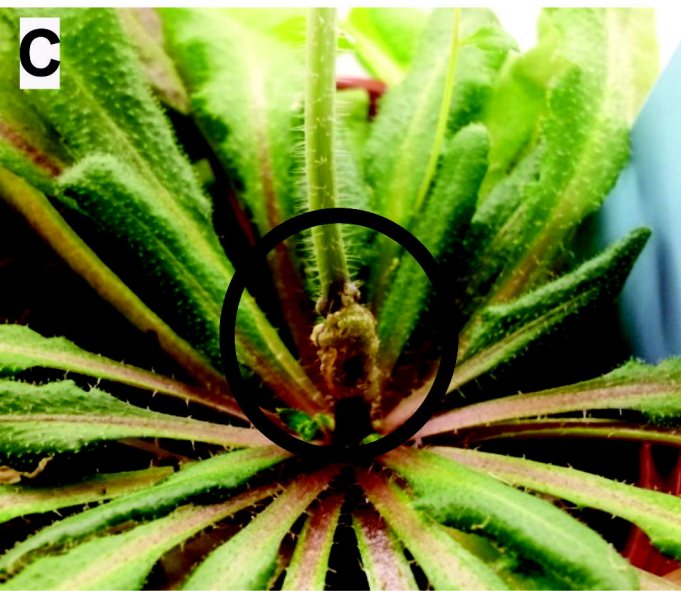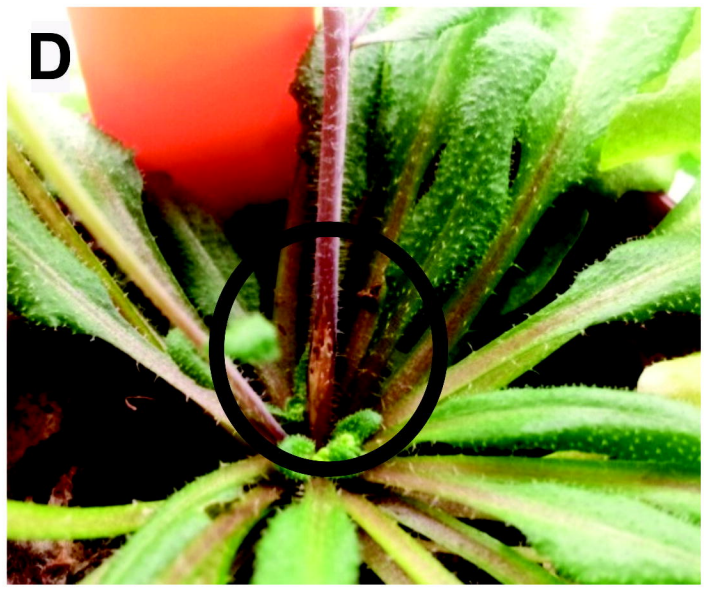

**A**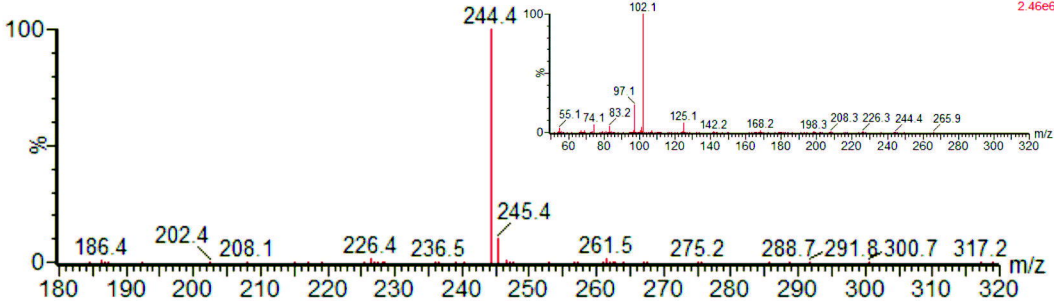**B**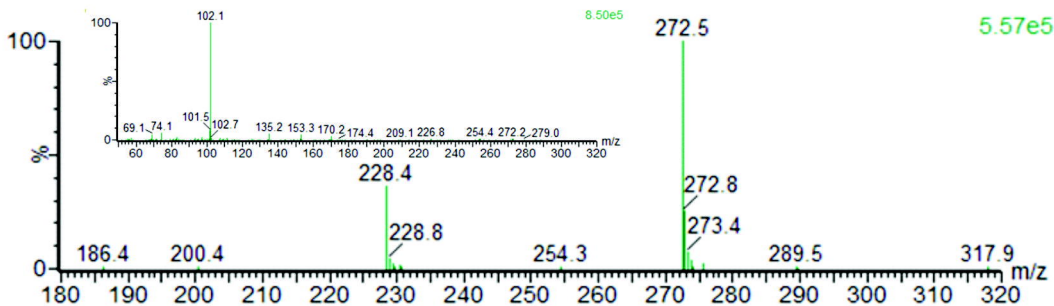**C**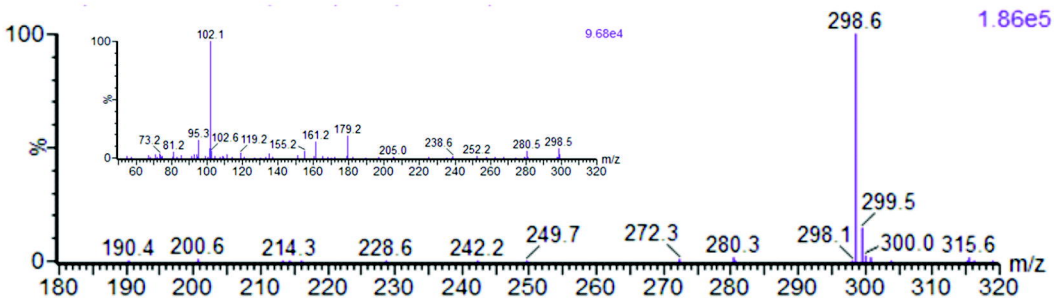**D**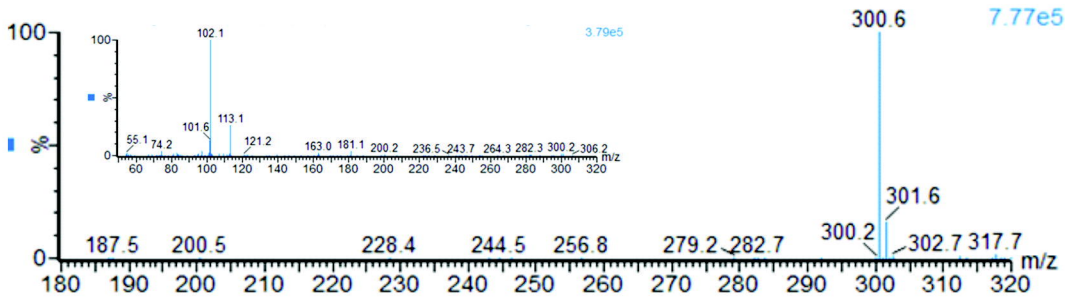



**A**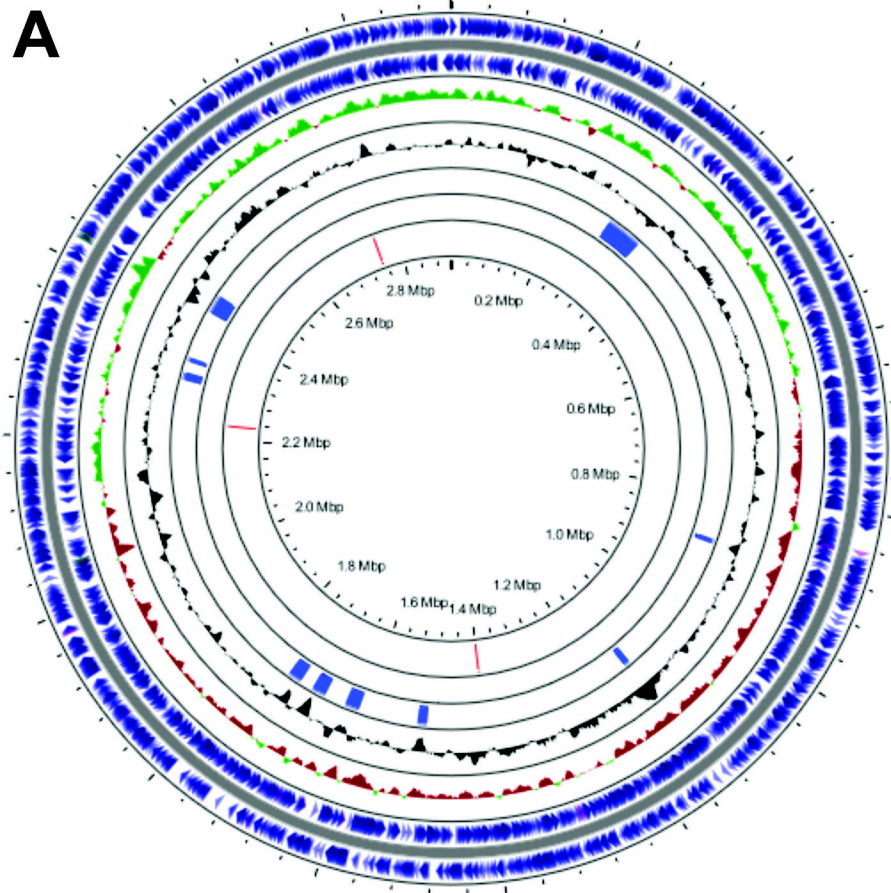**B**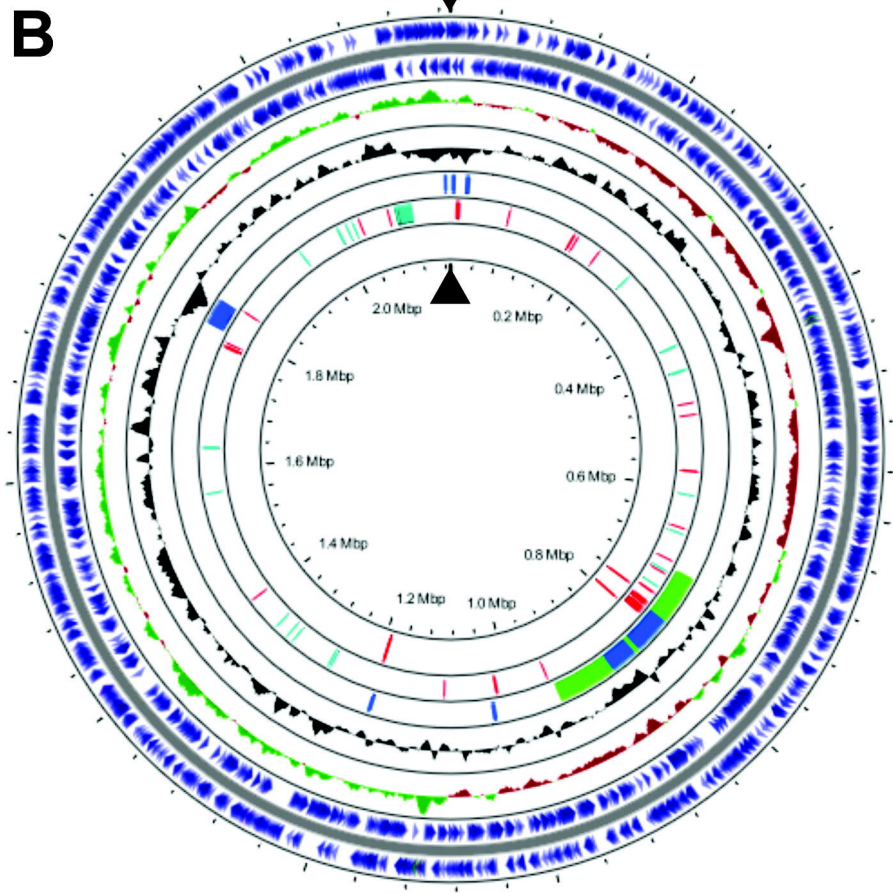

1189642

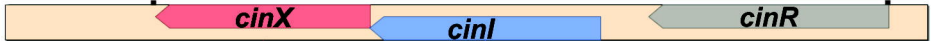

1192066

*cinX**cinI**cinR*

CC

762797

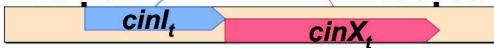

763959

*cinI<sub>t</sub>**cinX<sub>t</sub>*

793408

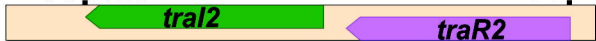

795011

*traI2**traR2*

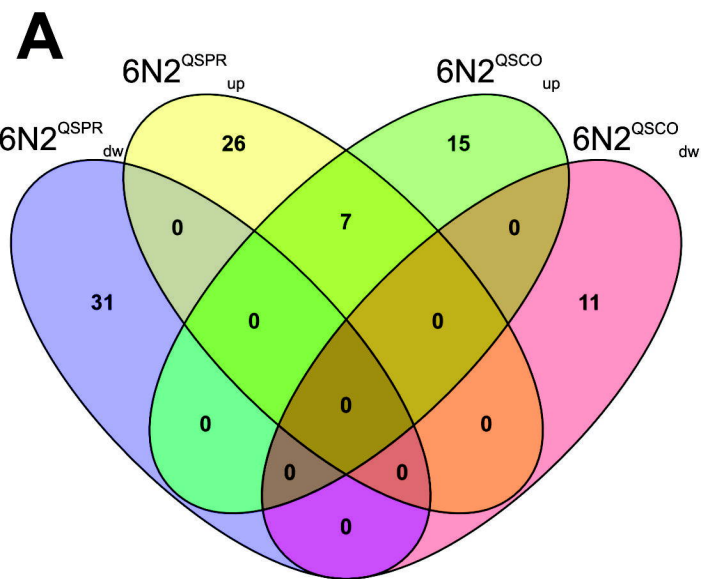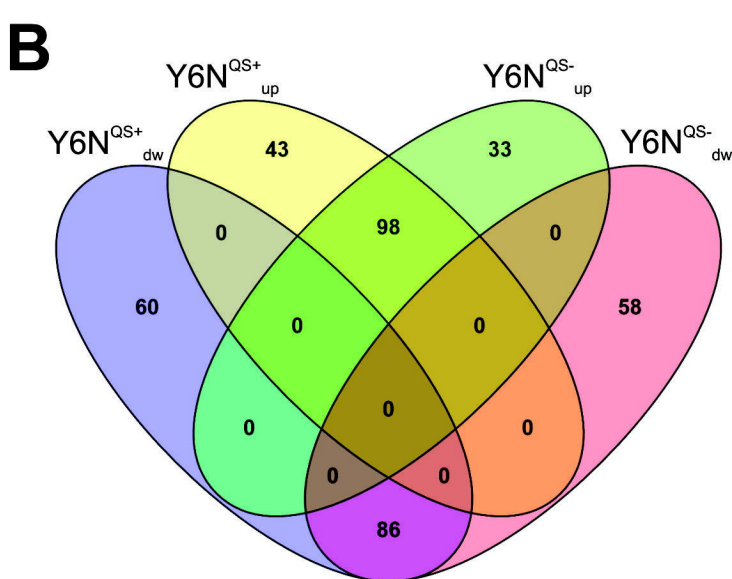

Source: http://biorxiv.org/content/10.1101/2021.10.17.464673v1.full.pdf
